# Supplementary material for: Q61 mutant-mediated dynamics changes of the GTP-KRAS complex probed by Gaussian accelerated molecular dynamics and free energy landscapes
Source: Royal Society of Chemistry journal article supplement (doi:10.1039/d1ra07936k), 2022-01-01
Supplement: d1ra07936k1.pdf [file d1ra07936k1.pdf]

**Q61 mutant-mediated dynamics changes of GTP-KRAS compound probed by  
Gaussian accelerated molecular dynamics and free energy landscapes†**

Jianzhong Chen<sup>a,\*</sup>, Qingkai Zeng<sup>a</sup>, Wei Wang<sup>a</sup>, Qingquan Hu<sup>a</sup> and Huayin Bao<sup>b,\*</sup>

---

\* Corresponding author.

<sup>a</sup>School of Science, Shandong Jiaotong University, Jinan, 250357, China E-mail:  
[chenjianzhong1970@163.com](mailto:chenjianzhong1970@163.com), [jzchen@sdjtu.edu.cn](mailto:jzchen@sdjtu.edu.cn) (J. Chen),

<sup>b</sup>School of Pharmacy, Shandong University of Traditional Chinese Medicine, Jinan, 250355, China.  
E-mail: [baohuayin@163.com](mailto:baohuayin@163.com) (H. Bao).

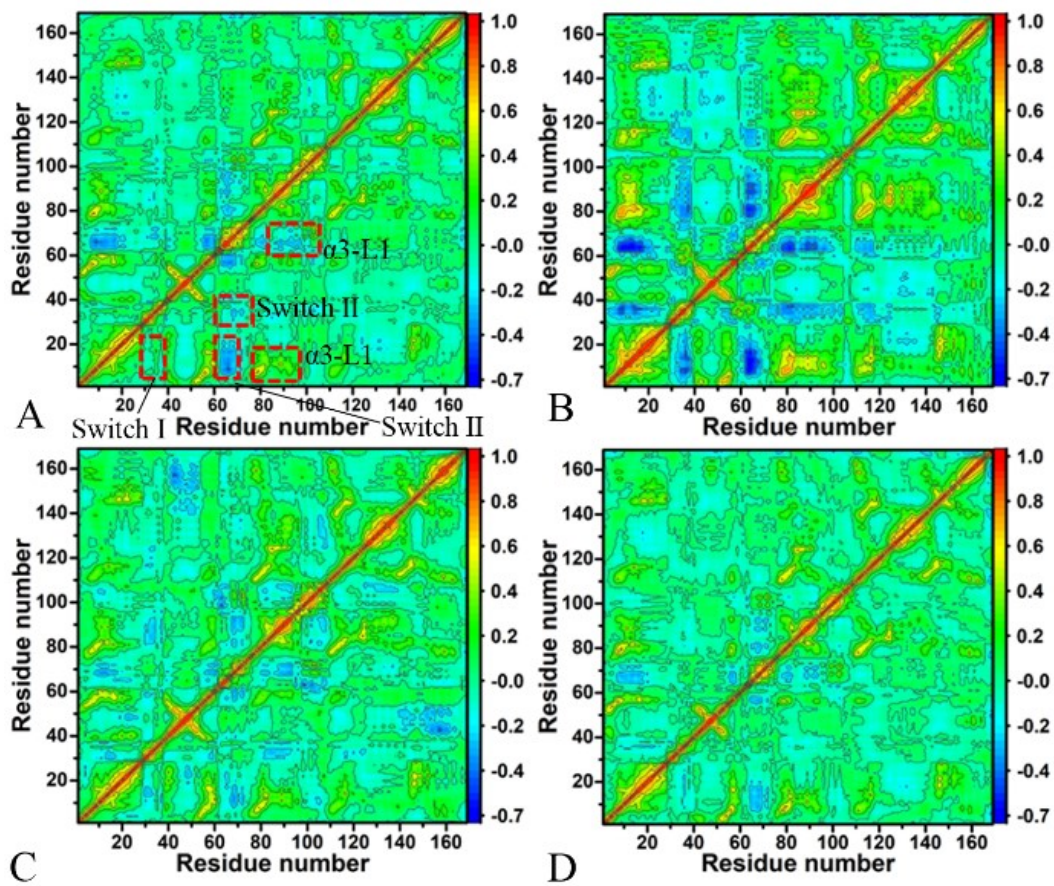

Fig. S1 Cross-correlation matrix calculated by using the coordinates of the  $C_{\alpha}$  atoms recorded in the single integrated MR-GaMD trajectory: (A) GTP-bound WT KRAS, (B) GTP-bound Q61A KRAS, (C) GTP-bound Q61H KRAS and (D) GTP-bound Q61L KRAS.

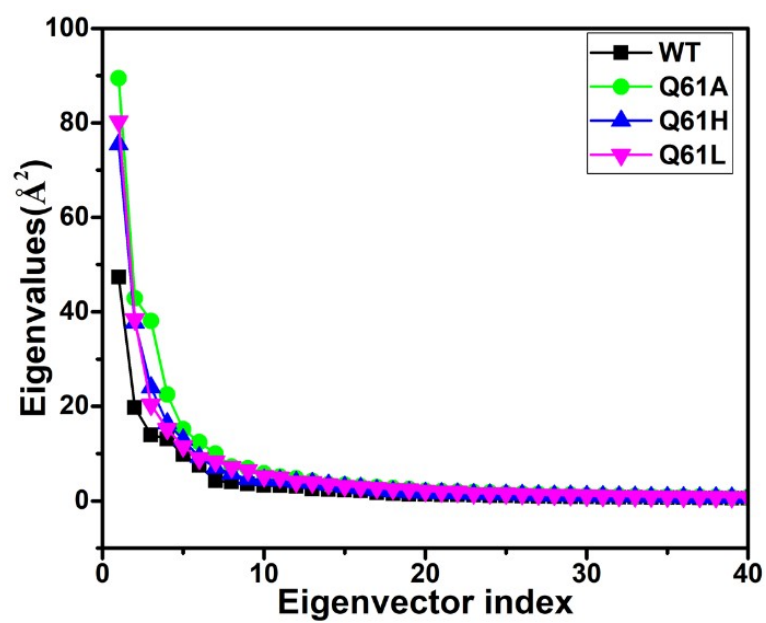

Fig. S2 Function of eigenvalues vs eigenvector indexes from principal component analysis, which is used to describe motion intensity of KRAS.

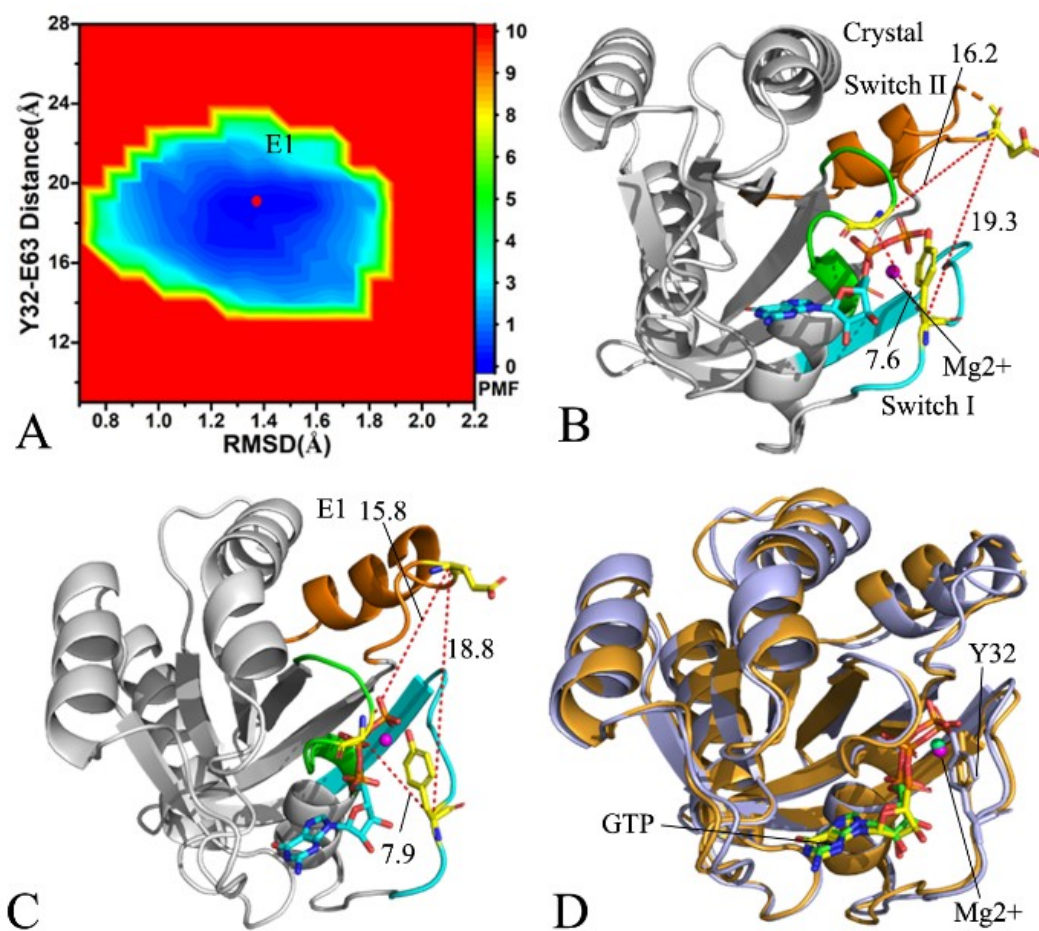

Fig. S3 Free energy landscapes and structures: (A) free energy landscape identified by MR-GaMD simulations, (B) crystal structure of the GTP-bound KRAS (PDB ID: 6MNX), (C) simulated structure located at energy valley E1 and (D) superimposition of crystal structure and simulated structure. The unit of all distances is Å and that of free energy is kcal/mol.

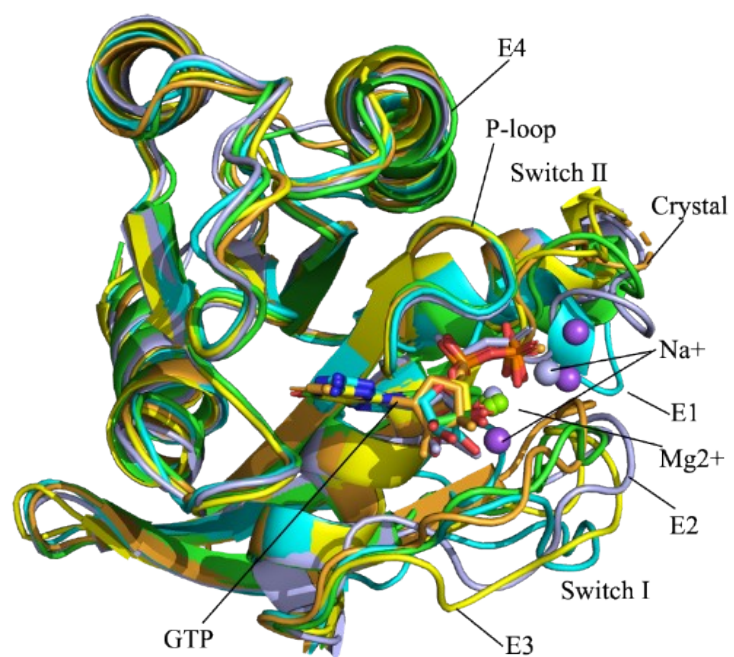

Fig. S4 Superimpositions of four representative structures of the GTP-bound Q61A KRAS situated at energy valleys E1, E2, E3 and E4 with crystal structure 6MNX.

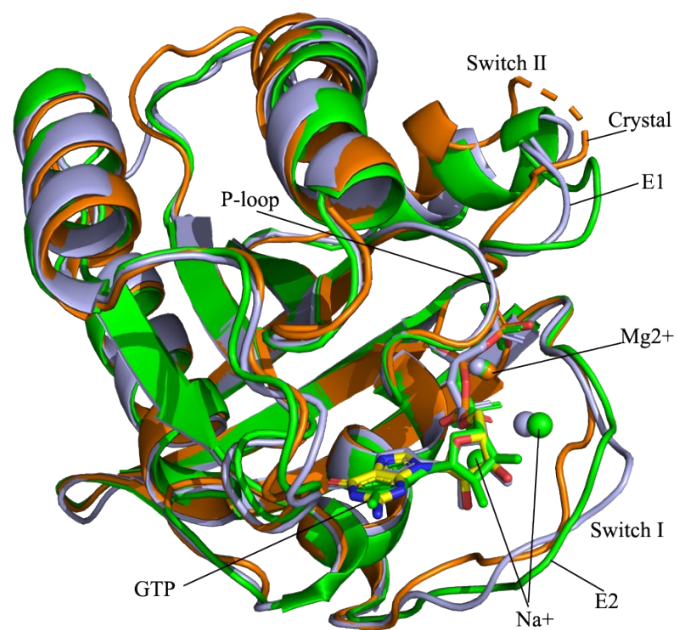

Fig. S5 Superimpositions of four representative structures of the GTP-bound Q61H KRAS situated at energy valleys E1 and E2 with crystal structure 6MNX.



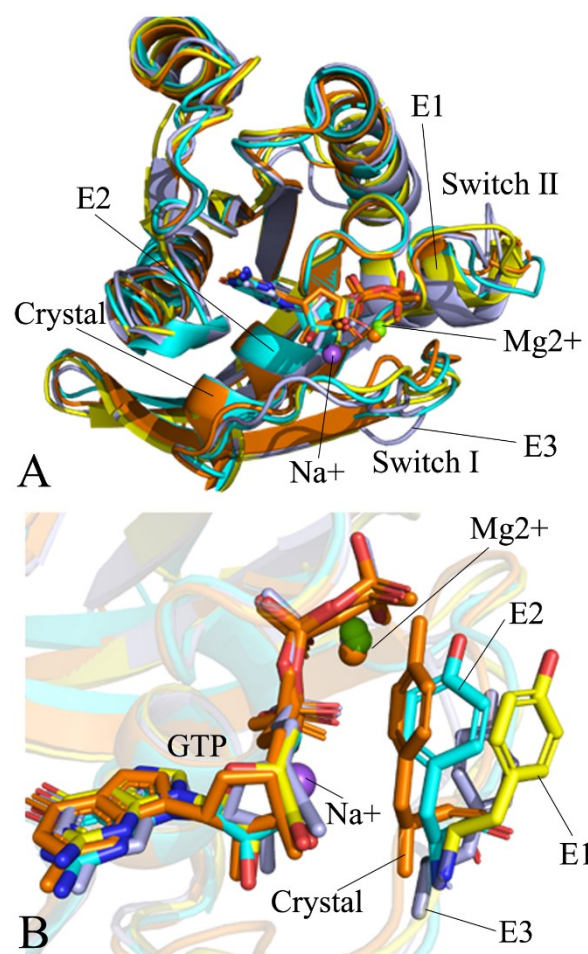

Fig. S6 (A) superimposition of three structures E1, E2 and E3 of the GTP-bound Q61L KRAS with the crystal structure (6MNX) and (B) alignment of GTP, ions and Y32 in three structures E1, E2 and E3 of the GTP-associated Q61L KRAS with that in the crystal structure (6MNX).

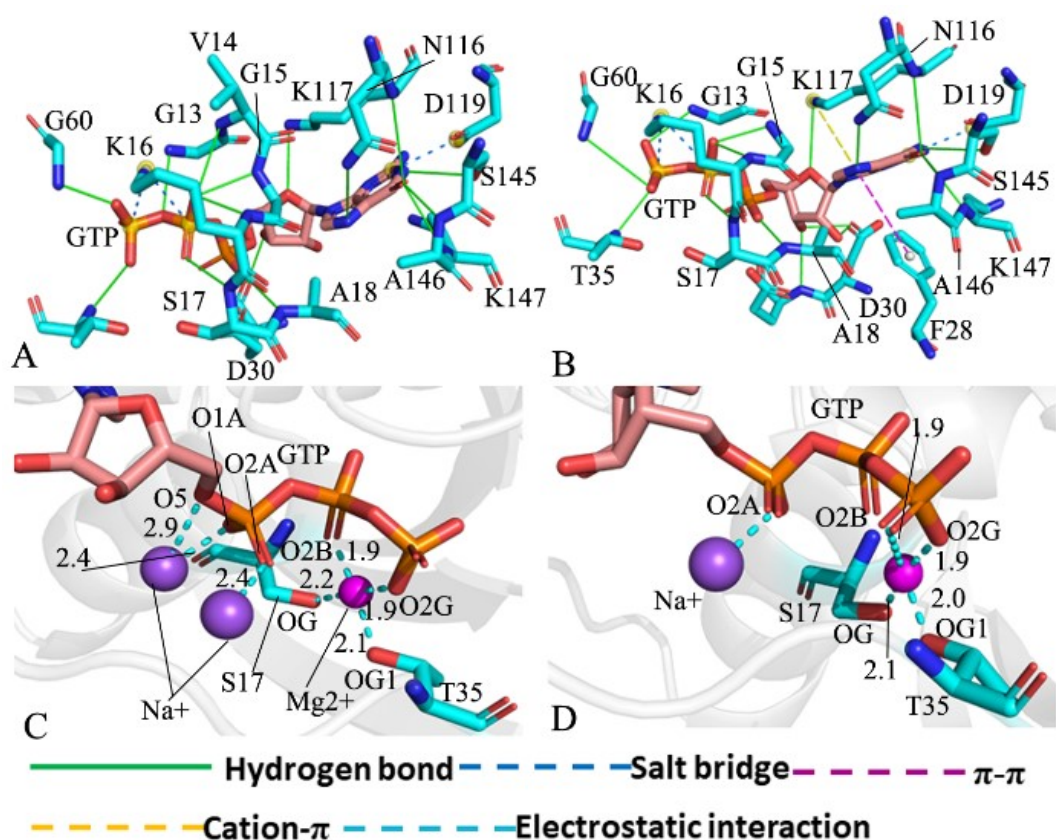

Fig. S7 Interactions of key residues in the GTP-bound Q61H KRAS: (A) interactions of GTP with residues in compact state of the switch domain, (B) interactions between GTP and residues in uncompact state of the switch domain, (C) interactions of magnesium ion  $\text{Mg}^{2+}$  and sodium ions  $\text{Na}^{+}$  with GTP and residues and (D) interactions of magnesium ion  $\text{Mg}^{2+}$  and sodium ion  $\text{Na}^{+}$  with GTP and residues.



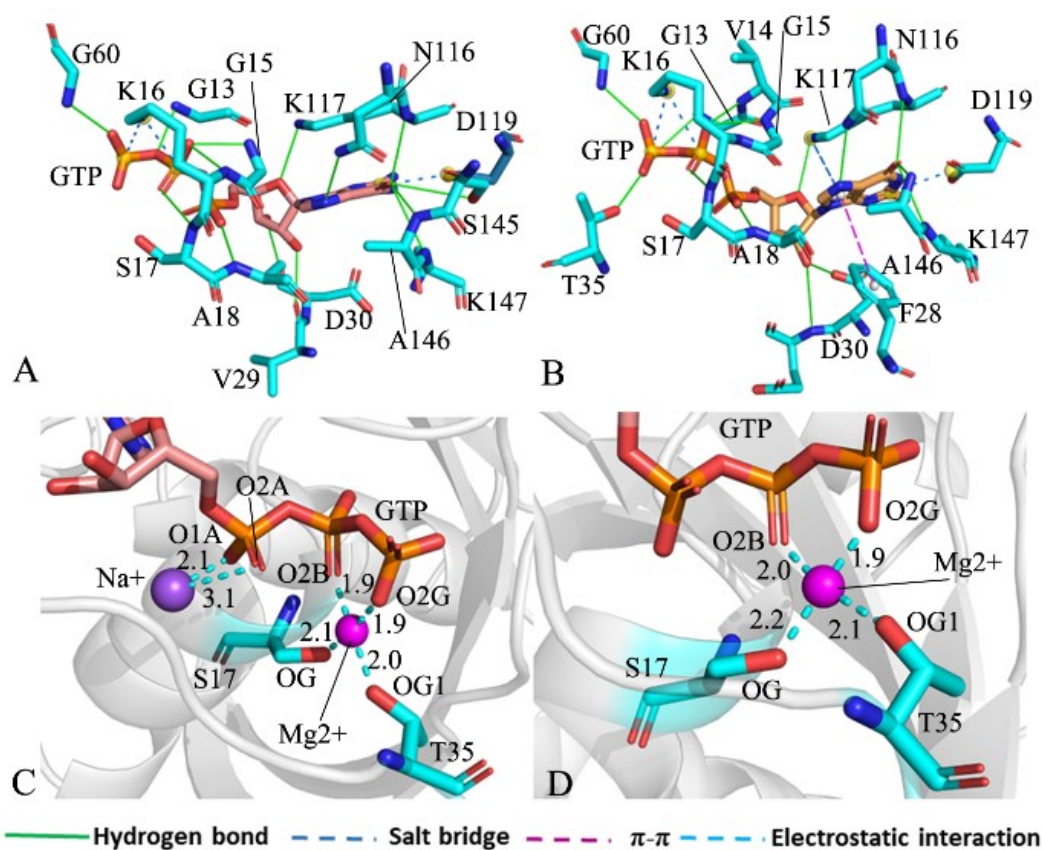

Fig. S8 Interactions of key residues in the GTP-bound Q61L KRAS: (A) interactions of GTP with residues in compact state of the switch domain, (B) interactions between GTP and residues in uncompact state of the switch domain, (C) interactions of magnesium ion  $Mg^{2+}$  and sodium ion  $Na^{+}$  with GTP and residues and (D) interactions of magnesium ion  $Mg^{2+}$  with GTP and residues.
